# Supplementary material for: Antineoplastic Effect of a Combined Mitotane Treatment/Ionizing Radiation in Adrenocortical Carcinoma: A Preclinical Study
Source: MDPI journal article supplement (doi:10.3390/cancers11111768), 2019-11-09
Supplement: s1 [file s1]

# Antineoplastic Effect of a Combined Mitotane Treatment/Ionizing Radiation in Adrenocortical Carcinoma: A Preclinical Study

Lidia Cerquetti, Barbara Bucci, Giulia Carpinelli, Pina Lardo, Antonella Proietti, Raffaele Saporito, Guido Rindi, Elisa Petrangeli, Vincenzo Toscano and Antonio Stigliano

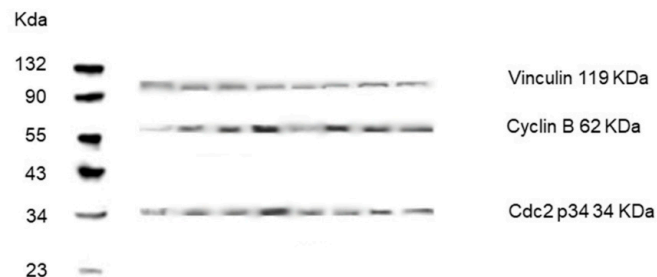

## Cyclin B 7 days

|        |            |
|--------|------------|
| C      | 3.052.246  |
| MTT    | 5.337.569  |
| IR     | 7.045.841  |
| MTT+IR | 13.852.196 |

## Cyclin B 14 days

|        |            |
|--------|------------|
| C      | 972.891    |
| MTT    | 6385,761   |
| IR     | 9.697.154  |
| MTT+IR | 12.324.857 |

## Cdc2 p34 7 days

|        |            |
|--------|------------|
| C      | 5.686.167  |
| MTT    | 4.536.205  |
| IR     | 5.567.418  |
| MTT+IR | 13.910.468 |

## Cdc2 p34 14 days

|        |            |
|--------|------------|
| C      | 2.013.125  |
| MTT    | 3.093.962  |
| IR     | 6.794.205  |
| MTT+IR | 11.010.619 |

**vinculin 7 days**

|        |            |
|--------|------------|
| C      | 12.516.894 |
| MTT    | 6.954.205  |
| IR     | 7.952.004  |
| MTT+IR | 4.665.640  |

**vinculin 14 days**

|        |           |
|--------|-----------|
| C      | 3.530.083 |
| MTT    | 5.151.104 |
| IR     | 7.031.790 |
| MTT+IR | 5.651.320 |

**Figure S1.** Densitometry readings/intensity ratio in triplicate of each band of Western blot shown in Figure 5 performed with the Image J software program.

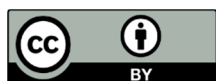

© 2019 by the authors. Licensee MDPI, Basel, Switzerland. This article is an open access article distributed under the terms and conditions of the Creative Commons Attribution (CC BY) license (<http://creativecommons.org/licenses/by/4.0/>).
